# Supplementary material
Source: ML conference proceedings conference paper supplement (https://openaccess.thecvf.com/content/ICCV2023/html/Ye_Wasserstein_Expansible_Variational_Autoencoder_for_Discriminative_and_Generative_Continual_Learning_ICCV_2023_paper.html)
Supplement: Supplementary file 1 [file Ye_Wasserstein_Expansible_Variational_Autoencoder_for_Discriminative_and_Generative_Continual_Learning_ICCV_2023_supplemental.pdf]

# Appendix for Wasserstein Expansible Variational Autoencoder for Discriminative and Generative Continual Learning

August 18, 2023

## Contents

|          |                                                             |           |
|----------|-------------------------------------------------------------|-----------|
| <b>A</b> | <b>Additional information for the proposed WEVAE</b>        | <b>3</b>  |
| <b>B</b> | <b>The proof of Theorem 1</b>                               | <b>5</b>  |
| <b>C</b> | <b>The proof of Theorem 2</b>                               | <b>8</b>  |
| <b>D</b> | <b>Analysis for selecting <math>\lambda</math></b>          | <b>8</b>  |
| <b>E</b> | <b>Additional information for the experiment setting</b>    | <b>9</b>  |
| E.1      | Experiment setting . . . . .                                | 9         |
| E.2      | The configuration for the classification task. . . . .      | 10        |
| E.3      | The configuration for the density estimation task . . . . . | 11        |
| <b>F</b> | <b>Additional results for ablation study</b>                | <b>12</b> |
| F.1      | Changing the memory size . . . . .                          | 12        |
| F.2      | Changing the threshold $\lambda$ . . . . .                  | 13        |
| F.3      | Changing the batch size . . . . .                           | 13        |
| F.4      | Model expansion process . . . . .                           | 13        |
| F.5      | Fuzzy task setting . . . . .                                | 14        |
| F.6      | Comparison with another sample selection approach . . . . . | 14        |
| F.7      | Computational complexity analysis . . . . .                 | 15        |
| F.8      | The knowledge diversity among WEVAE’s components . . . . .  | 16        |
| F.9      | Comparison to the task-aware baselines . . . . .            | 16        |

|                                                                       |    |
|-----------------------------------------------------------------------|----|
| F.10 Analysis for the model complexity . . . . .                      | 17 |
| F.11 The effect when not considering the stochastic process . . . . . | 18 |

## A Additional information for the proposed WEVAE

In this section, we provide the pseudocode for the proposed methodology of the Wasserstein Expansible Variational Autoencoder (WEVAE), which also involves the testing phase, which is provided in Algorithm 1. We summarize the learning procedure of WEVAE into four steps :

- **Step 1 (Sample selection).** At a certain training time  $\mathcal{T}_t$ , we add a new data batch into the memory buffer, expressed as  $\mathcal{M}_t = \mathcal{M}_t \cup \mathbf{X}_t, \mathbf{X}_t \sim \mathcal{S}$ . We will perform the sample selection using the novelty criterion based on the energy function form Eq. (5) and on a threshold  $\lambda$ , according to Eq. (4) from the paper if the memory buffer  $\mathcal{M}_t$  is not overloaded  $|\mathcal{M}_t| \leq |\mathcal{M}|^{max}$ .
- **Step 2 (Training process).** At the time  $\mathcal{T}_t$ , we train the current component  $\mathcal{G}_k$  on  $\mathcal{M}_t$  on a batch of samples, using Eq. (1) of the paper.
- **Step 3 (Check the model's expansion).** If the proposed WEVAE has only a single component, we then build the second component when reaching the critical mass of data samples in the buffer  $\mathcal{T}_t = |\mathcal{M}|^{max}$  aiming to preserve the initial knowledge that is used for the expansion process, otherwise, we describe the expansion process as follows : If the memory buffer is full  $|\mathcal{M}_t| = |\mathcal{M}|^{max}$ , we check the model's expansion using Eq.(4) of the paper to reduce the computational costs. If Eq. (4) of the paper is satisfied, we add new component  $\mathcal{G}_{k+1}$  into  $\mathbf{G}$ . We also clear up the memory buffer in order to allow the newly added component to learn non-overlapping data samples.
- **Step 4 (Testing phase).** We perform the component selection by comparing the sample log-likelihood estimated by each component and then select that component with the maximum sample log-likelihood for the evaluation.

**The derivation of Eq.(7) of the paper :**

The intractable marginal log-likelihood  $\log p(\mathbf{x}) = \iint \log p_\theta(\mathbf{x} | \mathbf{z}, \mathbf{y}) p(\mathbf{z}, \mathbf{y}) d\mathbf{z} d\mathbf{u}$

---

**Algorithm 1** Algorithm for WEVAE
 

---

```

1: (Input:The data stream);
2: for  $\mathcal{T}_t < \mathcal{T}_n$  do
3:   Sample selection in the memory buffer
4:    $\mathbf{X}_t \sim \mathcal{S}$ 
5:    $\mathcal{M}_t = \mathcal{M}_t \cup \mathbf{X}_t$ 
6:   if  $|\mathcal{M}_t| > |\mathcal{M}|^{max}$  then
7:     for  $t < |\mathcal{M}_t|$  do
8:        $E(\mathbf{x}'_t) = \frac{1}{k-1} \sum_{j=1}^{k-1} \left\{ \text{Re}(\mathbf{x}'_t, f_{\theta_j}(f_{\omega_j}(\mathbf{x}'_t))) \right\}$ 
9:     end for
10:     $\mathcal{M}_t = \bigcup_{i=1}^{|\mathcal{M}_t|^{max}} \mathcal{M}'_t[i]$ 
11:   end if
12:   Training process
13:   if  $k = 1$  and  $\mathcal{T}_t = |\mathcal{M}|^{max}$  then
14:     Add the second component  $\mathcal{G}_2$ 
15:   end if
16:   Train the current VAE component  $\mathcal{G}_t$  on  $\mathcal{M}_t$  using  $\mathcal{L}_{ELBO}$ 
17:   Check the expansion
18:   if  $|\mathcal{M}_t| > |\mathcal{M}|^{max}$  then
19:     if  $\mathbb{E}[w_{s_1}, \dots, w_{s_t}] > \lambda$  then
20:       Add a new Component  $\mathcal{G}_{k+1}$ 
21:     end if
22:   end if
23: end for
24: Testing phase
25: for  $i < n'$  do
26:    $\mathbf{x} \sim \mathcal{D}^T$ 
27:    $s^* = \arg \max_{s=1, \dots, k} \{ \mathcal{L}_{ELBO}(\mathbf{x}; \mathcal{G}_s) \}$ 
28:   Choose  $\mathcal{G}_{s^*}$  for the evaluation.
29: end for

```

---

26 can have a lower bound according to the Jensen's inequality :

$$\begin{aligned}
\log p(\mathbf{x}) &\geq \mathbb{E}_{q(\mathbf{z}, \mathbf{y}|\mathbf{x})} \left[ \log \frac{p(\mathbf{x}, \mathbf{z}, \mathbf{y})}{q(\mathbf{z}, \mathbf{y}|\mathbf{x})} \right] = \mathbb{E}_{q(\mathbf{z}, \mathbf{y}|\mathbf{x})} \left[ \log \frac{p(\mathbf{x}|\mathbf{z}, \mathbf{y})p(\mathbf{z})p(\mathbf{y})}{q(\mathbf{z}, \mathbf{y}|\mathbf{x})} \right] \\
&= \mathbb{E}_{q(\mathbf{z}|\mathbf{x})q(\mathbf{y}|\mathbf{x})} \left[ \log \frac{p(\mathbf{x}|\mathbf{z}, \mathbf{y})p(\mathbf{z})p(\mathbf{y})}{q(\mathbf{z}|\mathbf{x})q(\mathbf{y}|\mathbf{x})} \right] \\
&= \mathbb{E}_{q(\mathbf{z}, \mathbf{y}|\mathbf{x})} [\log p(\mathbf{x}|\mathbf{z}, \mathbf{y})] \\
&\quad + \mathbb{E}_{q(\mathbf{z}|\mathbf{x})q(\mathbf{y}|\mathbf{x})} \left[ \log \frac{p(\mathbf{z})}{q(\mathbf{z}|\mathbf{x})} \right] \\
&\quad + \mathbb{E}_{q(\mathbf{z}|\mathbf{x})q(\mathbf{y}|\mathbf{x})} \left[ \log \frac{p(\mathbf{y})}{q(\mathbf{y}|\mathbf{x})} \right]
\end{aligned} \tag{1}$$

where we also consider the independence between the variables  $\mathbf{y}$  and  $\mathbf{z}$ . Then according to the KL divergence form, Eq. (1) can be rewritten as :

$$\begin{aligned} \log p(\mathbf{x}) &\geq \mathbb{E}_{q(\mathbf{z}, \mathbf{y} | \mathbf{x})} [\log p(\mathbf{x} | \mathbf{z}, \mathbf{y})] \\ &\quad - D_{KL}(q(\mathbf{z} | \mathbf{x}) || p(\mathbf{z})) \\ &\quad - D_{KL}(q(\mathbf{y} | \mathbf{x}) || p(\mathbf{y})). \end{aligned} \quad (2)$$

where we omit the subscripts from Eq. (1) of the paper, for the sake of simplification.

## B The proof of Theorem 1

In this section, we provide the detailed proof according to the results from [13]. First, we consider a single component of WEVAE  $\mathcal{G}_c^i$ , which is trained on  $\mathcal{M}_i$  at  $\mathcal{T}_i$ . We have the following equation according to [13] :

$$\inf_{q_\omega(\mathbf{z})=p(\mathbf{z})} \mathbb{E}_{\mathbb{P}_{\hat{\mathbf{x}}_i}} [\mathcal{L}_{ELBO}(\mathbf{x}; \theta, \omega)] \leq -W_{\mathcal{L}}^*(\mathbb{P}_{\hat{\mathbf{x}}_i}, \mathbb{P}_{\hat{\mathbf{x}}_c^i}) - \frac{1}{2} \log \pi, \quad (3)$$

We then add  $-W_{\mathcal{L}}^*(\mathbb{P}_{\mathcal{M}_i}, \mathbb{P}_{\mathcal{G}_c^i})$  in both sides of Eq. (3), resulting in :

$$\begin{aligned} \inf_{q_\omega(\mathbf{z})=p(\mathbf{z})} \mathbb{E}_{\mathbb{P}_{\hat{\mathbf{x}}_i}} [\mathcal{L}_{ELBO}(\mathbf{x}; \theta, \omega)] - W_{\mathcal{L}}^*(\mathbb{P}_{\mathcal{M}_i}, \mathbb{P}_{\mathcal{G}_c^i}) &\leq -W_{\mathcal{L}}^*(\mathbb{P}_{\mathcal{M}_i}, \mathbb{P}_{\mathcal{G}_c^i}) \\ &\quad - W_{\mathcal{L}}^*(\mathbb{P}_{\mathbf{x}}, \mathbb{P}_{\mathcal{G}_c^i}) \\ &\quad - \frac{1}{2} \log \pi, \end{aligned} \quad (4)$$

where  $W_{\mathcal{L}}^*(\cdot, \cdot)$  is defined in Eq. (12) from the paper.

The first term in the right-hand side (RHS) of Eq. (4) is bounded according to [13] :

$$\inf_{q_\omega(\mathbf{z})=p(\mathbf{z})} \mathbb{E}_{\mathbb{P}_{\mathcal{M}_i}} \mathbb{E}_{q_\omega(\mathbf{z} | \mathbf{x})} [-\mathcal{L}(\mathbf{x}, \mathcal{G}_c^i(\mathbf{z}))] \leq -W_{\mathcal{L}}^*(\mathbb{P}_{\mathcal{M}_i}, \mathbb{P}_{\mathcal{G}_c^i}). \quad (5)$$

From Eq. (5), we have :

$$\begin{aligned} \inf_{q_\omega(\mathbf{z})=p(\mathbf{z})} \mathbb{E}_{\mathbb{P}_{\mathcal{M}_i}} \mathbb{E}_{q_\omega(\mathbf{z} | \mathbf{x})} [-\mathcal{L}(\mathbf{x}, \mathcal{G}_c^i(\mathbf{z}))] \\ + \left| \inf_{q_\omega(\mathbf{z})=p(\mathbf{z})} \mathbb{E}_{\mathbb{P}_{\mathcal{M}_i}} \mathbb{E}_{q_\omega(\mathbf{z} | \mathbf{x})} [-\mathcal{L}(\mathbf{x}, \mathcal{G}_c^i(\mathbf{z}))] - W_{\mathcal{L}}^*(\mathbb{P}_{\mathcal{M}_i}, \mathbb{P}_{\mathcal{G}_c^i}) \right| &\geq \\ - W_{\mathcal{L}}^*(\mathbb{P}_{\mathcal{M}_i}, \mathbb{P}_{\mathcal{G}_c^i}), \end{aligned} \quad (6)$$

We then replace the first term in the RHS of Eq. (4) by the above equation, resulting

39 in :

$$\begin{aligned}
& \inf_{q_\omega(\mathbf{z})=p(\mathbf{z})} \mathbb{E}_{\mathbb{P}_{\tilde{\mathbf{x}}_i}} [\mathcal{L}_{ELBO}(\mathbf{x}; \theta, \omega)] - W_{\mathcal{L}}^*(\mathbb{P}_{\mathcal{M}_i}, \mathbb{P}_{\mathcal{G}_c^i}) \\
& \leq \inf_{q_\omega(\mathbf{z})=p(\mathbf{z})} \mathbb{E}_{\mathbb{P}_{\mathcal{M}_i}} \mathbb{E}_{q_\omega(\mathbf{z}|\mathbf{x})} [-\mathcal{L}(\mathbf{x}, \mathcal{G}_c^i(\mathbf{z}))] - W_{\mathcal{L}}^*(\mathbb{P}_{\mathbf{x}}, \mathbb{P}_{\mathcal{G}_c^i}) \\
& + \left| \inf_{q_\omega(\mathbf{z})=p(\mathbf{z})} \mathbb{E}_{\mathbb{P}_{\mathcal{M}_i}} \mathbb{E}_{q_\omega(\mathbf{z}|\mathbf{x})} [-\mathcal{L}(\mathbf{x}, \mathcal{G}_c^i(\mathbf{z}))] - W_{\mathcal{L}}^*(\mathbb{P}_{\mathcal{M}_i}, \mathbb{P}_{\mathcal{G}_c^i}) \right| \\
& - \frac{1}{2} \log \pi,
\end{aligned} \tag{7}$$

40 We then add the negative KL divergence term in both sides of Eq. (7) :

$$\begin{aligned}
& \inf_{q_\omega(\mathbf{z})=p(\mathbf{z})} \mathbb{E}_{\mathbb{P}_{\tilde{\mathbf{x}}_i}} [\mathcal{L}_{ELBO}(\mathbf{x}; \theta, \omega)] - W_{\mathcal{L}}^*(\mathbb{P}_{\mathcal{M}_i}, \mathbb{P}_{\mathcal{G}_c^i}) \\
& - \inf_{q_\omega(\mathbf{z})=p(\mathbf{z})} \mathbb{E}_{\mathbb{P}_{\mathcal{M}_i}} [D_{KL}(q_\omega(\mathbf{z}|\mathbf{x}) || p(\mathbf{z}))] \leq \\
& \underbrace{\inf_{q_\omega(\mathbf{z})=p(\mathbf{z})} \mathbb{E}_{\mathbb{P}_{\mathcal{M}_i}} \mathbb{E}_{q_\omega(\mathbf{z}|\mathbf{x})} [-\mathcal{L}(\mathbf{x}, \mathcal{G}_c^i(\mathbf{z}))] - \inf_{q_\omega(\mathbf{z})=p(\mathbf{z})} \mathbb{E}_{\mathbb{P}_{\mathcal{M}_i}} [D_{KL}(q_\omega(\mathbf{z}|\mathbf{x}) || p(\mathbf{z}))]}_{\text{ELBO}} - \frac{1}{2} \log \pi \\
& - W_{\mathcal{L}}^*(\mathbb{P}_{\mathbf{x}}, \mathbb{P}_{\mathcal{G}_c^i}) + \left| \inf_{q_\omega(\mathbf{z})=p(\mathbf{z})} \mathbb{E}_{\mathbb{P}_{\mathcal{M}_i}} \mathbb{E}_{q_\omega(\mathbf{z}|\mathbf{x})} [-\mathcal{L}(\mathbf{x}, \mathcal{G}_c^i(\mathbf{z}))] - W_{\mathcal{L}}^*(\mathbb{P}_{\mathcal{M}_i}, \mathbb{P}_{\mathcal{G}_c^i}) \right|,
\end{aligned} \tag{8}$$

41 According to the definition of ELBO, Eq. (8) can be rewritten as :

$$\begin{aligned}
& \inf_{q_\omega(\mathbf{z})=p(\mathbf{z})} \mathbb{E}_{\mathbb{P}_{\tilde{\mathbf{x}}_i}} [\mathcal{L}_{ELBO}(\mathbf{x}; \theta, \omega)] \\
& - W_{\mathcal{L}}^*(\mathbb{P}_{\mathcal{M}_i}, \mathbb{P}_{\mathcal{G}_c^i}) - \inf_{q_\omega(\mathbf{z})=p(\mathbf{z})} \mathbb{E}_{\mathbb{P}_{\mathcal{M}_i}} [D_{KL}(q_\omega(\mathbf{z}|\mathbf{x}) || p(\mathbf{z}))] \leq \\
& \inf_{q_\omega(\mathbf{z})=p(\mathbf{z})} \mathbb{E}_{\mathbb{P}_{\mathcal{M}_i}} [\mathcal{L}_{ELBO}(\mathbf{x}; \theta, \omega)] - W_{\mathcal{L}}^*(\mathbb{P}_{\mathbf{x}}, \mathbb{P}_{\mathcal{G}_c^i}) \\
& + \left| \inf_{q_\omega(\mathbf{z})=p(\mathbf{z})} \mathbb{E}_{\mathbb{P}_{\mathcal{M}_i}} \mathbb{E}_{q_\omega(\mathbf{z}|\mathbf{x})} [-\mathcal{L}(\mathbf{x}, \mathcal{G}_c^i(\mathbf{z}))] - W_{\mathcal{L}}^*(\mathbb{P}_{\mathcal{M}_i}, \mathbb{P}_{\mathcal{G}_c^i}) \right|,
\end{aligned} \tag{9}$$

42 Then we rewrite Eq. (9), resulting in :

$$\begin{aligned}
\inf_{q_\omega(\mathbf{z})=p(\mathbf{z})} \mathbb{E}_{\mathbb{P}_{\tilde{\mathbf{x}}_i}} [\mathcal{L}_{ELBO}(\mathbf{x}; \theta, \omega)] & \leq \inf_{q_\omega(\mathbf{z})=p(\mathbf{z})} \mathbb{E}_{\mathbb{P}_{\mathcal{M}_i}} [\mathcal{L}_{ELBO}(\mathbf{x}; \theta, \omega)] + W_{\mathcal{L}}^*(\mathbb{P}_{\mathcal{M}_i}, \mathbb{P}_{\mathcal{G}_c^i}) \\
& - W_{\mathcal{L}}^*(\mathbb{P}_{\mathbf{x}}, \mathbb{P}_{\mathcal{G}_c^i}) \\
& + \inf_{q_\omega(\mathbf{z})=p(\mathbf{z})} \mathbb{E}_{\mathbb{P}_{\mathcal{M}_i}} [D_{KL}(q_\omega(\mathbf{z}|\mathbf{x}) || p(\mathbf{z}))] \\
& + \left| \inf_{q_\omega(\mathbf{z})=p(\mathbf{z})} \mathbb{E}_{\mathbb{P}_{\mathcal{M}_i}} \mathbb{E}_{q_\omega(\mathbf{z}|\mathbf{x})} [-\mathcal{L}(\mathbf{x}, \mathcal{G}_c^i(\mathbf{z}))] \right. \\
& \left. - W_{\mathcal{L}}^*(\mathbb{P}_{\mathcal{M}_i}, \mathbb{P}_{\mathcal{G}_c^i}) \right|,
\end{aligned} \tag{10}$$

We consider that  $\mathcal{L}(\cdot)$  satisfies triangle inequality, we have :

43

$$W_{\mathcal{L}}^*(\mathbb{P}_{\mathcal{M}_i}, \mathbb{P}_{\mathcal{G}_c^i}) + W_{\mathcal{L}}^*(\mathbb{P}_{\mathbf{x}}, \mathbb{P}_{\mathcal{G}_c^i}) \geq W_{\mathcal{L}}^*(\mathbb{P}_{\hat{\mathbf{x}}_i}, \mathbb{P}_{\mathcal{M}_i}) \quad (11)$$

We move the second term in the left-hand side of Eq. (11) in the right-hand side :

44

$$W_{\mathcal{L}}^*(\mathbb{P}_{\hat{\mathbf{x}}_i}, \mathbb{P}_{\mathcal{G}_c^i}) \geq W_{\mathcal{L}}^*(\mathbb{P}_{\hat{\mathbf{x}}_i}, \mathbb{P}_{\mathcal{M}_i}) - W_{\mathcal{L}}^*(\mathbb{P}_{\mathcal{M}_i}, \mathbb{P}_{\mathcal{G}_c^i}) \quad (12)$$

Then we replace  $W_{\mathcal{L}}^*(\mathbb{P}_{\hat{\mathbf{x}}_i}, \mathbb{P}_{\mathcal{G}_c^i})$  from Eq. (10) by the expression of Eq. (12), resulting in :

45

46

$$\begin{aligned} \inf_{q_{\omega}(\mathbf{z})=p(\mathbf{z})} \mathbb{E}_{\mathbb{P}_{\hat{\mathbf{x}}_i}} [\mathcal{L}_{ELBO}(\mathbf{x}; \theta, \omega)] &\leq \inf_{q_{\omega}(\mathbf{z})=p(\mathbf{z})} \mathbb{E}_{\mathbb{P}_{\mathcal{M}_i}} [\mathcal{L}_{ELBO}(\mathbf{x}; \theta, \omega)] \\ &+ 2W_{\mathcal{L}}^*(\mathbb{P}_{\mathcal{M}_i}, \mathbb{P}_{\mathcal{G}_c^i}) \\ &- W_{\mathcal{L}}^*(\mathbb{P}_{\hat{\mathbf{x}}_i}, \mathbb{P}_{\mathcal{M}_i}) + \tilde{F}(\mathbb{P}_{\mathcal{G}_c^i}, \mathbb{P}_{\mathcal{M}_i}), \end{aligned} \quad (13)$$

where  $\tilde{F}(\mathbb{P}_{\mathcal{G}_c^i}, \mathbb{P}_{\mathcal{M}_i})$  is expressed as :

47

$$\begin{aligned} \tilde{F}(\mathbb{P}_{\mathcal{G}_c^i}, \mathbb{P}_{\mathcal{M}_i}) &= \inf_{q_{\omega}(\mathbf{z})=p(\mathbf{z})} \mathbb{E}_{\mathbb{P}_{\mathcal{M}_i}} [D_{KL}(q_{\omega}(\mathbf{z} | \mathbf{x}) || p(\mathbf{z}))] \\ &+ \left| \inf_{q_{\omega}(\mathbf{z})=p(\mathbf{z})} \mathbb{E}_{\mathbb{P}_{\mathcal{M}_i}} \mathbb{E}_{q_{\omega}(\mathbf{z} | \mathbf{x})} [-\mathcal{L}(\mathbf{x}, \mathcal{G}_c^i(\mathbf{z}))] - W_{\mathcal{L}}^*(\mathbb{P}_{\mathcal{M}_i}, \mathbb{P}_{\mathcal{G}_c^i}) \right| \end{aligned} \quad (14)$$

For the sake of simplification we omit inf in Eq. (13), resulting in :

48

$$\begin{aligned} \mathbb{E}_{\mathbb{P}_{\hat{\mathbf{x}}_i}} [\mathcal{L}_{ELBO}(\mathbf{x}; \theta, \omega)] &\leq \mathbb{E}_{\mathbb{P}_{\mathcal{M}_i}} [\mathcal{L}_{ELBO}(\mathbf{x}; \theta, \omega)] \\ &+ 2W_{\mathcal{L}}^*(\mathbb{P}_{\mathcal{M}_i}, \mathbb{P}_{\mathcal{G}_c^i}) \\ &- W_{\mathcal{L}}^*(\mathbb{P}_{\hat{\mathbf{x}}_i}, \mathbb{P}_{\mathcal{M}_i}) + \tilde{F}(\mathbb{P}_{\mathcal{G}_c^i}, \mathbb{P}_{\mathcal{M}_i}), \end{aligned} \quad (15)$$

This results in the derivation of a bound for a single component  $\mathcal{Q}_c^i$ . We can easily extend Eq. (15) for a WEVAE mixture model  $\mathbf{G} = \{\mathcal{G}_1, \dots, \mathcal{G}_k\}$ , resulting in :

49

50

$$\begin{aligned} \sum_{j=1}^{a_i} \sum_{t=1}^{c_j} \left\{ \left\{ \tilde{F}_s(\mathbf{G}, \mathbb{P}_{\mathbf{x}_i^j(t)}) \right\} \right\} &\leq \\ \sum_{j=1}^{a_i} \sum_{t=1}^{c_j} \left\{ \left\{ F_s(\mathbf{G}, \mathbb{P}_{\mathbf{x}_i^j(t)}) \right\} \right\} & \end{aligned} \quad (16)$$

□

which corresponds to Eq. (9) from the paper.

51

## 52 C The proof of Theorem 2

53 Let us consider a WEVAE model  $\mathbf{G}$  with  $k$  components, we can view  $\mathbf{G}$  as a single  
 54 model trained on all memories  $\{\mathcal{M}_{b_1}, \dots, \mathcal{M}_{b_k}\}$ , based on the component selection  
 55 (Eq.(10) of the paper). Let  $\mathbb{P}_{\tilde{\mathbf{x}}^i}$  be the distribution of samples equally drawn from each  
 56 component  $\{\mathcal{G}_j, j = 1, \dots, |\mathbf{G}|\}$  at  $\mathcal{T}_i$ . Let  $\mathbb{P}_{\mathcal{M}_{b_1:b_k}}$  be the distribution of all memories  
 57  $\{\mathcal{M}_{b_1}, \dots, \mathcal{M}_{b_k}\}$ . Based on Eq. (15), we have :

$$\begin{aligned} \mathbb{E}_{\mathbb{P}_{\tilde{\mathbf{x}}^i}} [\mathcal{L}_{ELBO}(\mathbf{x}; \mathbf{G})] &\leq \mathbb{E}_{\mathbb{P}_{\mathcal{M}_{b_1:b_k}}} [\mathcal{L}_{ELBO}(\mathbf{x}; \mathbf{G})] \\ &+ 2W_{\mathcal{L}}^*(\mathbb{P}_{\mathcal{M}_{b_1:b_k}}, \mathbb{P}_{\tilde{\mathbf{x}}^i}) - W_{\mathcal{L}}^*(\mathbb{P}_{\tilde{\mathbf{x}}^i}, \mathbb{P}_{\mathcal{M}_{b_1:b_k}}) \\ &+ \tilde{\mathbb{F}}(\mathbb{P}_{\tilde{\mathbf{x}}^i}, \mathbb{P}_{\mathcal{M}_{b_1:b_k}}), \end{aligned} \quad (17)$$

58  $\square$

59 In the following, we compare the proposed WEVAE model with the static model  
 60 under the theoretical framework defined in the paper. We start with providing the  
 61 definition of the static model.

62 **Definition 4.** Let  $\mathcal{G}^i$  be a single/static model which is trained on  $\mathcal{M}_i$  at  $\mathcal{T}_i$ . Let  $\mathbb{P}_{\mathcal{G}^i}$  be  
 63 the distribution of samples drawn from the generation process of  $\mathcal{G}^i$  at  $\mathcal{T}_i$ .

64 **Lemma 1.** Based on **Definition 4.**, we can derive a bound for a single/static model at  
 65  $\mathcal{T}_i$  :

$$\begin{aligned} \mathbb{E}_{\mathbb{P}_{\tilde{\mathbf{x}}^i}} [\mathcal{L}_{ELBO}(\mathbf{x}; \mathcal{G}^i)] &\leq \mathbb{E}_{\mathbb{P}_{\mathcal{M}_i}} [\mathcal{L}_{ELBO}(\mathbf{x}; \mathcal{G}^i)] \\ &+ 2W_{\mathcal{L}}^*(\mathbb{P}_{\mathcal{M}_i}, \mathbb{P}_{\mathcal{G}^i}) - W_{\mathcal{L}}^*(\mathbb{P}_{\tilde{\mathbf{x}}^i}, \mathbb{P}_{\mathcal{M}_i}) \\ &+ \tilde{\mathbb{F}}(\mathbb{P}_{\mathcal{G}^i}, \mathbb{P}_{\mathcal{M}_i}), \end{aligned} \quad (18)$$

66 Eq. (18) when compared to Eq. (17), has smaller upper bound since the term  
 67  $W_{\mathcal{L}}^*(\mathbb{P}_{\tilde{\mathbf{x}}^i}, \mathbb{P}_{\mathcal{M}_{b_1:b_k}})$  in the RHS of Eq. (17) can be reduced significantly when training  
 68 more components. This shows that the proposed WEVAE naturally performs better  
 69 than the single/static model.

## 70 D Analysis for selecting $\lambda$

71 In this section, we theoretically analyze the role of the threshold  $\lambda$  used for model ex-  
 72 pansion in Eq. (4) and the model’s generalization performance. According to Theorem



2, we have :

$$\begin{aligned} \mathbb{E}_{\mathbb{P}_{\tilde{\mathbf{x}}^i}} [\mathcal{L}_{ELBO}(\mathbf{x}; \mathbf{G})] &\leq \mathbb{E}_{\mathbb{P}_{\mathcal{M}_{b_1:b_k}}} [\mathcal{L}_{ELBO}(\mathbf{x}; \mathbf{G})] \\ &+ 2W_{\mathcal{L}}^*(\mathbb{P}_{\mathcal{M}_{b_1:b_k}}, \mathbb{P}_{\tilde{\mathbf{x}}^i}) - W_{\mathcal{L}}^*(\mathbb{P}_{\tilde{\mathbf{x}}^i}, \mathbb{P}_{\mathcal{M}_{b_1:b_k}}) \\ &+ \tilde{F}(\mathbb{P}_{\tilde{\mathbf{x}}^i}, \mathbb{P}_{\mathcal{M}_{b_1:b_k}}). \end{aligned} \tag{19}$$

A large threshold  $\lambda$  encourages the model to frequently build new components, resulting in a model with many components ( $k$  in Eq. (19) is large). Then the distribution  $\mathbb{P}_{\mathcal{M}_{b_1:b_k}}$  would preserve more knowledge from the data stream and can thus reduce the term  $2W_{\mathcal{L}}^*(\mathbb{P}_{\mathcal{M}_{b_1:b_k}}, \mathbb{P}_{\tilde{\mathbf{x}}^i})$  in Eq. (19), leading to better performance. In contrast, if we consider a small  $\lambda$ , this would prevent WEVAE model’s expansion, leading to fewer components. Therefore, the distribution  $\mathbb{P}_{\mathcal{M}_{b_1:b_k}}$  would miss some underlying data distributions from the data stream and the term  $2W_{\mathcal{L}}^*(\mathbb{P}_{\mathcal{M}_{b_1:b_k}}, \mathbb{P}_{\tilde{\mathbf{x}}^i})$  is increased in Eq. (19), leading to worse performance. The optimal threshold  $\lambda$  should ensure a good trade-off between the model size and its resulting generalization performance. Optimally, this would be implemented by ensuring that each individual WEVAE component models a unique data distribution. In this way we would minimize the overlap between the statistical representations by two different components and WEVAE would represent a diversity of distributions while using an optimal number of parameters.

## E Additional information for the experiment setting

**The release of the code.** We have provided the detailed implementation of the proposed Wasserstein Expansible Variational Autoencoder (WEVAE) model. We also provide the source code in the supplemental material. In addition, We will provide after properly organizing the source code used in the experiments and for the testing of the WEVAE model for the sake of easy understanding and for facilitating the re-implementation and we will release it publicly on <https://github.com/>, if the paper is accepted.

### E.1 Experiment setting

**The hyperparameter configuration and GPU hardware.** For all experiments, we use Adam [6] with a learning rate of 0.0001 and its default hyperparameters. For the density estimation task, we employ the batch size of 64 and one training epoch for training. All experiments are performed on the server with the operating system Ubuntu 18.04.5. We also use the GPU (NVIDIA A40) for all our experiments.

101 **The configuration of the network architecture for density estimation task.** Following from  
102 [3], we use two fully connected layers for implementing the generator and inference  
103 models. Each layer in the neural network has 200 hidden units. The maximum mem-  
104 ory size for Split MNIST, Split Fashion, Split MNIST-Fashion, Cross-domain is 1.5K,  
105 1.5K, 1.9K and 2.0K, respectively.

106 **Additional information for the evaluation.** All results reported in the paper are evalu-  
107 ated on the testing datasets after the task-free continual learning.

## 108 **E.2 The configuration for the classification task.**

109 In this section, we provide the detailed information for the classification task. First, we  
110 employ several datasets including Split MNIST, Split CIFAR10, Split CIFAR100 and  
111 Split MiniImageNet, which are introduced in the following.

112 **Split MNIST.** We divide MNIST which contains 60k training samples into five tasks,  
113 each consisting of images from two classes, in consecutive order of their displayed  
114 digits, while increasing the numbers represented in the images [4].

115 **Split CIFAR10.** We split CIFAR10 into five tasks where each task consists of samples  
116 from two different classes [4].

117 **Split CIFAR100.** We split CIFAR100 into 20 tasks where each task has 2500 examples  
118 from five different classes [8].

119 **Split MiniImageNet.** We divide the MiniImageNet into 20 tasks [10], where each task  
120 collects the images of five classes [2].

121 In the following, we describe the detailed information of the network architecture  
122 used in our classification task.

123 We adapt ResNet 18 [5] for Split CIFAR10 and Split CIFAR100. We use an MLP  
124 network with 2 hidden layers of 400 units each [4] for Split MNIST. The maximum  
125 memory size for Split MNIST, Split CIFAR10, Split CIFAR100 are 2000, 1000 and  
126 5000, respectively. At the testing phase, we make the component selection by compar-  
127 ing the sample log-likelihood and the classifier of the selected component is used for  
128 prediction.

129 We introduce additional information for several baselines, used in the experimental  
130 results from the Tables 1-4 from the paper, in the following.

131 **Finetune** trains a single model directly on a new batch of images during the online  
132 continual learning.

133 **Gradient Episodic Memory (GEM) [8]** is a memory-based approach that would use the

memory to store past samples. GEM is also required to access both the task label and class label during the training.

**Dynamic-OCM [13]** is a dynamic expansion model which proposes an online cooperative memorization (OCM) approach. OCM manages two memory buffers, aiming to store short- and long-term knowledge during training. In addition, Dynamic-OCM detects the change of the loss value as expansion signals, which does not have theoretical guarantees.

**Incremental Classifier and Representation Learning (iCARL) [9]** is a standard memory-based method used in a class incremental setup.

**reservoir\* [11]** is a memory-based approach that stores the observed samples into a memory buffer  $\mathcal{M}$  with probability  $|\mathcal{M}|/n$  where  $n$  is the number of stored samples, and  $|\cdot|$  represents the cardinality of a set.

**MIR [2]** introduces a retrieval strategy for the sample selection in the memory during the Online Continual Learning (OCL). However, the retrieval strategy in MIR requires evaluating the loss in each training session. This means that MIR requires modifying the retrieval strategy for different tasks such as classification or generation tasks.

**GSS [1]** formulates the sample selection process as a constraint reduction problem. GSS stores samples in a buffer using the gradient information which requires to access the class labels and can not be applied in the unsupervised learning setting.

### E.3 The configuration for the density estimation task

Following from [13], we compare our model (WEVAE) with existing TFCL methods in the density estimation task, which are outlined as : (1) VAE-ELBO-OCM : A single VAE model with ELBO using the Online Cooperative Memorization (OCM) [13]. (2) VAE-IWVAE50-OCM : A single VAE model with IWVAE using the OCM where the number of importance samples is 50. (3) VAE-ELBO-Random : A single VAE model with a memory that randomly removes samples when it reaches the maximum memory size. (4) Dynamic-ELBO-OCM : A mixture model with ELBO using OCM [13]. (5) CNDPM [7]; (6) LIMix [12] : We assign an episodic memory with a fixed buffer size for the LIMix model used for TFCL. The maximum number of components for various models is set to 30 to avoid memory overload. For the classification task, we adopt the baselines from the recently adopted TFCL benchmark from [4].

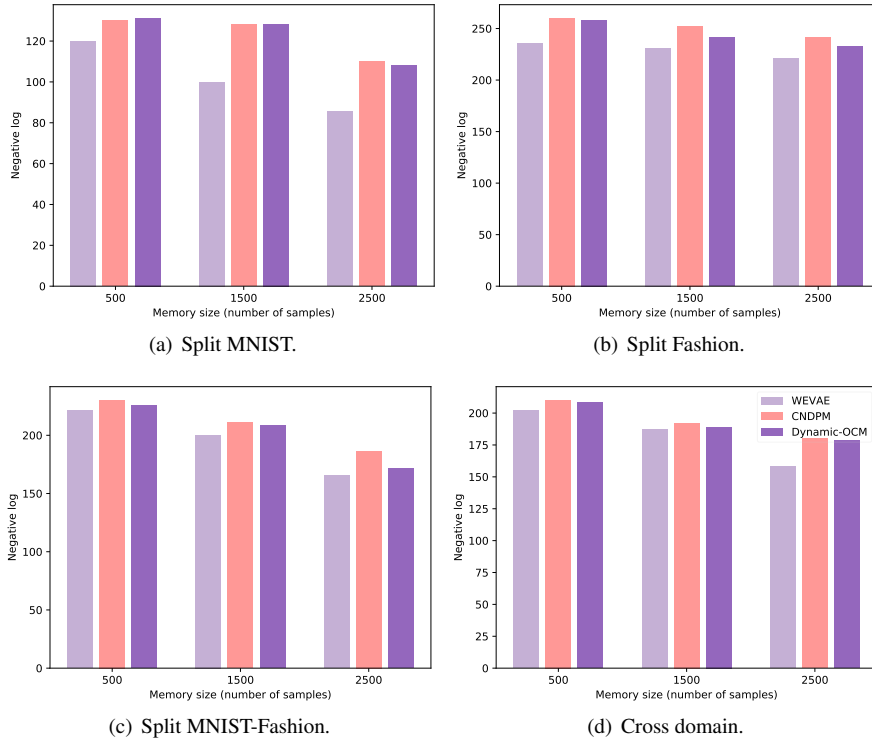

Figure 1: The performance of various models on four datasets when changing the memory size.

## F Additional results for ablation study

165

166 In this section, we provide additional results for the ablation study, which investigate  
 167 the effectiveness of each module of the proposed WEVAE.

### F.1 Changing the memory size

168

169 We evaluate the performance of various models by changing the memory size, and the  
 170 results are provided in Fig. 1. As the memory buffer increases its capacity, all models  
 171 improve their performance. The proposed WEVAE outperforms other models on all  
 172 memory configurations, even if the memory buffer can only store 500 samples. In  
 173 addition, the proposed WEVAE outperforms other baselines by a large margin when  
 174 having enough memorized samples.

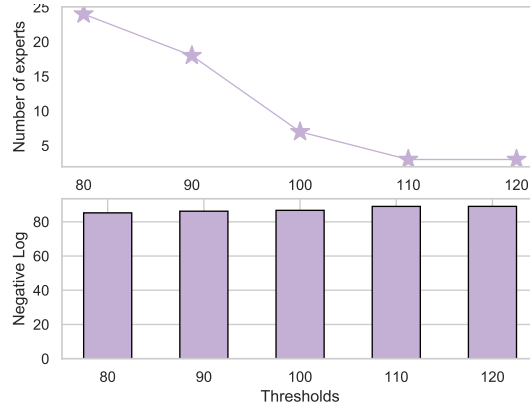

Figure 2: The performance and the number of components of WEVAE when changing the expansion threshold  $\lambda$  in the density estimation task on Split MNIST.

## F.2 Changing the threshold $\lambda$

175

We investigate the performance and the number of components of WEVAE on Split MNIST when changing the threshold  $\lambda$  and the results are shown in Fig. 2. Decreasing  $\lambda$  can increase the number of components but does not lead to a significant improvement in the performance. These results show that the proposed WEVAE can achieve good performance using only three components, demonstrating that each component in WEVAE can capture different knowledge well.

176

177

178

179

180

181

## F.3 Changing the batch size

182

We also investigate the performance and the number of components of WEVAE when changing the batch size, and the results are shown in Fig. 3 on Split MNIST dataset. We can observe that the proposed WEVAE does not suffer from a degenerated performance and maintains a similar number of components when changing the batch size.

183

184

185

186

## F.4 Model expansion process

187

We investigate the number of components of WEVAE and the change of the distribution (task) on Split MNIST in the classification task, and the results are reported in Fig. 4. The proposed WEVAE frequently creates components at the initial learning stage instead of the later learning stages. The reason is that when WEVAE has accumulated more knowledge, it does not need more components to learn the related information

188

189

190

191

192

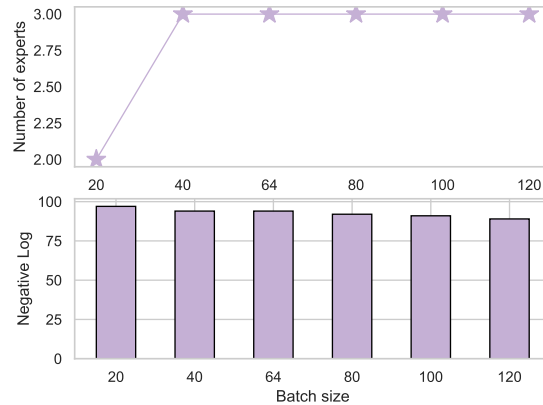

Figure 3: The performance and the number of components of WEVAE when changing the batch size on Split MNIST.

193 in the later learning process. In addition, a small threshold  $\lambda$  encourages WEVAE to  
 194 build more components. A suitable threshold  $\lambda$  such as 60 enables the WEVAE to  
 195 employ a reasonable number of components where each component captures a unique  
 196 underlying data distribution.

## 197 F.5 Fuzzy task setting

198 In a realistic continual learning setting, a model usually accesses samples drawn from a  
 199 data stream with fuzzy task boundaries [7]. In this section, we evaluate the performance  
 200 of various models on the fuzzy task setting. We employ the same procedure as in [7],  
 201 which swaps randomly chosen samples between two tasks from each data stream. The  
 202 results are reported in Tab. 1, which show that the proposed WEVAE outperforms other  
 203 baselines on the fuzzy task setting.

## 204 F.6 Comparison with another sample selection approach

205 We create two baselines WEVAE-GSS and WEVAE reservoir, which employ GSS and  
 206 Reservoir, respectively, for sample selection. The results for the classification task  
 207 are provided in Tab. 2. These results demonstrate that the proposed sample selection  
 208 approach outperforms using the Reservoir’s sample selection approach in all datasets  
 209 considered.

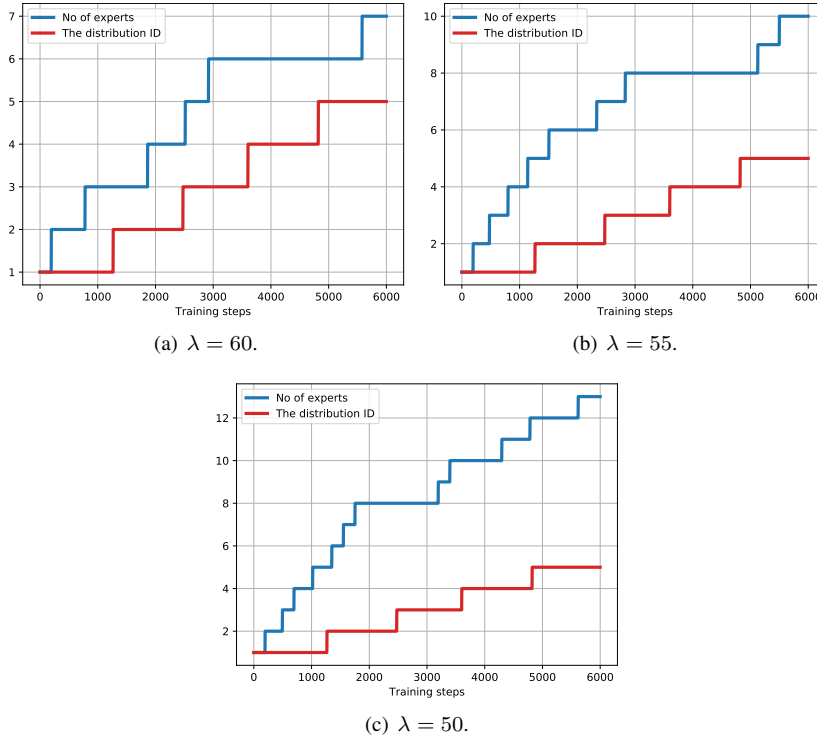

Figure 4: The number of components of WEVAE and the change of the distribution on Split MNIST in the classification task.

## F.7 Computational complexity analysis

210

We investigate the computational costs of the proposed WEVAE in the classification task, and the results are provided in Tab. 3. We find that the proposed WEVAE requires more training time than CNDPM. This is because the proposed dynamic expansion mechanism uses the generative replay process, leading to additional computational costs. However, the proposed WEVAE outperforms CNDPM by a large margin on various tasks while requiring similar computational times compared with CNDPM. Furthermore, to compare with Dynamic-OCM, the proposed WEVAE is more efficient since Dynamic-OCM requires performing the sample selection for the memory buffer. As a result, the proposed WEVAE outperforms Dynamic-OCM on both the density estimation and classification tasks.

211

212

213

214

215

216

217

218

219

220

| Methods   | Split MNIST            | Split CIFAR10          | Split MImageNet        |
|-----------|------------------------|------------------------|------------------------|
| Vanilla   | 21.53 $\pm$ 0.1        | 20.69 $\pm$ 2.4        | 3.05 $\pm$ 0.6         |
| ER        | 79.74 $\pm$ 4.0        | 37.15 $\pm$ 1.6        | 26.47 $\pm$ 2.3        |
| MIR       | 84.80 $\pm$ 1.9        | 38.70 $\pm$ 1.7        | 25.83 $\pm$ 1.5        |
| ER + GMED | 82.73 $\pm$ 2.6        | 40.57 $\pm$ 1.7        | 28.20 $\pm$ 0.6        |
| MIR+GMED  | 86.17 $\pm$ 1.7        | 41.22 $\pm$ 1.1        | 26.86 $\pm$ 0.7        |
| WEVAE     | <b>88.78</b> $\pm$ 1.2 | <b>45.26</b> $\pm$ 1.8 | <b>30.12</b> $\pm$ 1.2 |
| WEVAE-NoS | 87.65 $\pm$ 1.3        | 44.97 $\pm$ 1.3        | 29.57 $\pm$ 0.9        |

Table 1: The classification accuracy of five independent runs for various models over data streams with fuzzy task boundaries.

| Methods         | Split MNIST  | Split CIFAR10 | Split CIFAR100 |
|-----------------|--------------|---------------|----------------|
| WEVAE-GSS       | 94.32        | 51.98         | 22.62          |
| WEVAE-reservoir | 94.12        | 51.02         | 22.18          |
| WEVAE           | <b>96.63</b> | <b>54.98</b>  | <b>25.03</b>   |

Table 2: The classification accuracy of various models on three datasets, respectively.

## 221 **F.8 The knowledge diversity among WEVAE’s components**

222 We investigate whether the proposed WEVAE can train its mixture components to learn  
223 diverse information during the training. We train WEVAE on Split MNIST in the clas-  
224 sification task. After training, the proposed WEVAE builds seven components and we  
225 show the results for the data generated by each component in Fig. 5. We can observe  
226 that each component generates images belonging to a different underlying data distri-  
227 bution, demonstrating that the proposed WEVAE can train its components, each being  
228 characterized by a different probabilistic representtaion, which is consistent with our  
229 theoretical analysis from **Theorem 2** of the paper.

## 230 **F.9 Comparison to the task-aware baselines**

231 In this section, we compare the proposed WEVAE with the task-aware approaches on  
232 a long sequence of tasks. According to the setting from [12], we consider a sequence



| Methods     | Split MNIST | Split CIFAR10 | Split CIFAR100 |
|-------------|-------------|---------------|----------------|
| WEVAE       | 1.3         | 20.02         | 33.52          |
| CNDPM       | 0.9         | 18.6          | 30.23          |
| Dynamic-OCM | 10.2        | 42.3          | 47.8           |

Table 3: The training time (minutes) of various models.

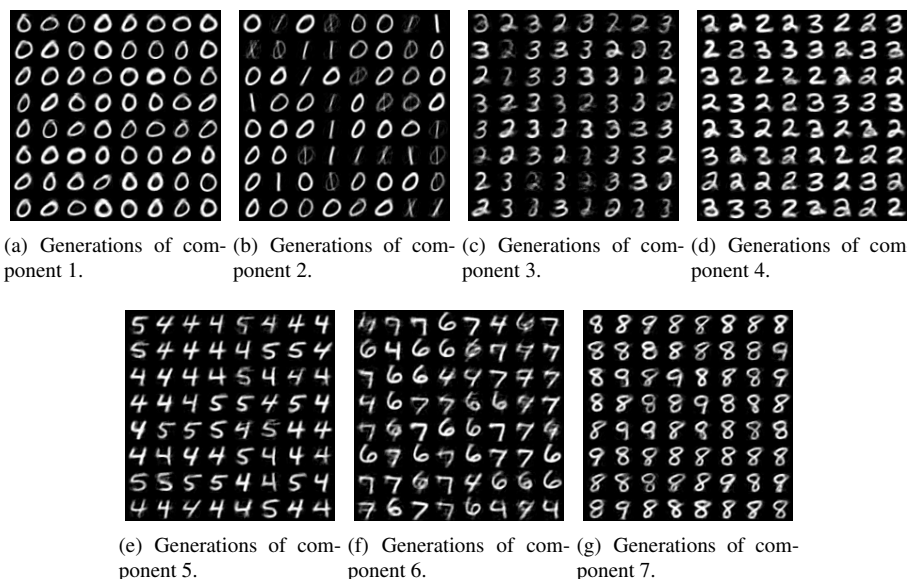

Figure 5: The generation of each expert in DSvitE on Split MNIST

of several databases, including MNIST, Fashion, SVHN, Inverse Fashion (IFashion), 233  
 Rotate MNIST (RMNIST), resulting in the sequence MSFIR. We assign a memory 234  
 buffer that can store maximum 5000 samples for the proposed WEVAE. The batch size 235  
 is 64 and the results are reported in Tab. 4 where the results of all comparison baselines 236  
 are taken from [12]. These results show that the proposed WEVAE still performs other 237  
 methods even if the task information is not provided. 238

## F.10 Analysis for the model complexity 239

In this section, we analyze the model complexity of various models under the density 240  
 estimation task. The number of parameters of various models are reported in Tab. 5. 241

| Datasets       | MSE    |        |       |              |        |        |
|----------------|--------|--------|-------|--------------|--------|--------|
|                | LGM    | CURL   | BE    | GMM          | Stud   | WEVAE  |
| MNIST          | 129.93 | 211.21 | 19.24 | 26.64        | 176.82 | 67.41  |
| Fashion        | 89.28  | 110.60 | 38.81 | 33.67        | 178.04 | 92.56  |
| SVHN           | 169.55 | 102.06 | 39.57 | 30.27        | 146.70 | 114.63 |
| IFashion       | 432.90 | 115.29 | 36.52 | 35.03        | 158.18 | 59.09  |
| RMNIST         | 130.28 | 279.47 | 25.41 | 22.97        | 157.55 | 68.68  |
| <b>Average</b> | 190.38 | 163.72 | 31.91 | <b>29.71</b> | 163.45 | 80.47  |

Table 4: The performance of various models after MSFIR lifelong learning.

| Methods          | Split MNIST | Split Fashion | Split MNIST-Fashion | Cross domain |
|------------------|-------------|---------------|---------------------|--------------|
| WEVAE            | 6M          | 20M           | 16M                 | 18M          |
| WEVAE-NoS        | 10M         | 20M           | 16M                 | 18M          |
| LIMix            | 60M         | 60M           | 60M                 | 60M          |
| CNDPM            | 60M         | 60M           | 60M                 | 60M          |
| Dynamic-ELBO-OCM | 10M         | 20M           | 20M                 | 22M          |

Table 5: The number of parameters of various models under the density estimation task. ‘M’ represents millions of parameters. WEVAE-NoS, represents the situation where we do not consider the sample selection mechanism, as described in Section 4.2 in the paper.

242 These results show that the proposed WEVAE employs equal or fewer parameters while  
 243 achieving better performance than other dynamic expansion models.

### 244 **F.11 The effect when not considering the stochastic process**

245 In this section, we investigate the effect of the proposed WEVAE without using the  
 246 stochastic process. Eq.(3) of the paper can be rewritten as the expansion criterion :

$$\min \{(\mathcal{L}_d(\mathbb{P}_{\theta_1^{t_1}}, \mathbb{P}_{\theta_k^t}), \dots, \mathcal{L}_d(\mathbb{P}_{\theta_{k-1}^{t_{k-1}}}, \mathbb{P}_{\theta_k^t})\} \geq \lambda, \quad (20)$$

247 We call WEVAE using Eq. (20) as WEVAE-1. We train both WEVAE and WEVAE-  
 248 1 using the same hyperparameter configuration on Split MNIST, Split CIFAR10 and

| Methods | Split MNIST | N | Split CIFAR10 | N | Split CIFAR100 | N |
|---------|-------------|---|---------------|---|----------------|---|
| WEVAE   | 96.87       | 5 | 55.26         | 6 | 25.12          | 5 |
| WEVAE-1 | 95.75       | 7 | 54.12         | 8 | 24.74          | 6 |

Table 6: Classification accuracy of various models on three datasets.

Split CIFAR100. The classification results are reported in Tab. 6, which show that WEVAE outperforms WEVAE-1 while employing fewer components. These results demonstrate that the stochastic process can further improve the performance and reduce the number of parameters for WEVAE.

## 253 References

- 254 [1] R. Aljundi, M. Lin, B. Goujaud, and Y. Bengio. Gradient based sample selection  
255 for online continual learning. In *Advances in Neural Information Processing*  
256 *Systems (NeurIPS)*, pages 11817–11826, 2019. 11
- 257 [2] Rahaf Aljundi, Eugene Belilovsky, Tinne Tuytelaars, Laurent Charlin, Massimo  
258 Caccia, Min Lin, and Lucas Page-Caccia. Online continual learning with maxi-  
259 mal interfered retrieval. In *Advances in Neural Information Processing Systems*  
260 *(NeurIPS)*, pages 11872–11883, 2019. 10, 11
- 261 [3] Yuri Burda, Roger Grosse, and Ruslan Salakhutdinov. Importance weighted au-  
262 toencoders. *arXiv preprint arXiv:1509.00519*, 2015. 10
- 263 [4] Matthias De Lange and Tinne Tuytelaars. Continual prototype evolution: Learn-  
264 ing online from non-stationary data streams. In *Proc. of the IEEE/CVF Inter-*  
265 *national Conference on Computer Vision (ICCV)*, pages 8250–8259, 2021. 10,  
266 11
- 267 [5] K. He, X. Zhang, S. Ren, and J. Sun. Deep residual learning for image recog-  
268 nition. In *Proc. of IEEE Conf. on Computer Vision and Pattern Recog. (CVPR)*,  
269 pages 770–778, 2016. 10
- 270 [6] Diederik P. Kingma and Jimmy Ba. Adam: A method for stochastic optimiza-  
271 tion. In *Proc. Int. Conf. on Learning Representations (ICLR)*, *arXiv preprint*  
272 *arXiv:1412.6980*, 2015. 9
- 273 [7] Soochan Lee, Junsoo Ha, Dongsu Zhang, and Gunhee Kim. A neural Dirichlet  
274 process mixture model for task-free continual learning. In *Int. Conf. on Learning*  
275 *Representations (ICLR)*, *arXiv preprint arXiv:2001.00689*, 2020. 11, 14
- 276 [8] David Lopez-Paz and Marc’Aurelio Ranzato. Gradient episodic memory for con-  
277 tinual learning. In *Advances in Neural Information Processing Systems (NIPS)*,  
278 pages 6467–6476, 2017. 10
- 279 [9] Sylvestre-Alvise Rebuffi, Alexander Kolesnikov, Georg Sperl, and Christoph H  
280 Lampert. iCaRL: Incremental classifier and representation learning. In *Proc.*  
281 *of the IEEE Conf. on Computer Vision and Pattern Recognition (CVPR)*, pages  
282 2001–2010, 2017. 11

- [10] Oriol Vinyals, Charles Blundell, Timothy Lillicrap, Koray Kavukcuoglu, and Daan Wierstra. Matching networks for one shot learning. *Advances in neural information processing systems (NIPS)*, 29:3637–3645, 2016. 10
- [11] Jeffrey Vitter. Random sampling with a reservoir. *ACM Trans. on Mathematical Software (TOMS)*, 11(1):37–57, 1985. 11
- [12] Fei Ye and Adrian G. Bors. Lifelong infinite mixture model based on knowledge-driven Dirichlet process. In *Proc. of the IEEE International Conference on Computer Vision (ICCV)*, pages 10695–10704, 2021. 11, 16, 17
- [13] Fei Ye and Adrian G. Bors. Continual variational autoencoder learning via online cooperative memorization. In *Proc. European Conference on Computer Vision (ECCV)*, vol. LNCS 13683, pages 531–549, 2022. 5, 11
